# Supplementary material for: Effects of root phenotypic changes on the deep rooting of Populus euphratica seedlings under drought stresses
Source: PeerJ. 2019 Feb 28;7:e6513. doi: 10.7717/peerj.6513 (PMC6397757; doi:10.7717/peerj.6513)
Supplement: Supplemental Information 2 — In column B (Treatments) of this table, 1 in represents treatment with Non-drought stress, 2 in column B represents treatments with moderate drought stress and 3 in column B represents treatments with severe drought stress. [file peerj-07-6513-s002.xlsx]

## Sheet: Data
Numbers	Treatments	Total biomass(g)	belowground biomass(g)	aboveground biomass(g)	Taproot biomass(g)	Total root length (cm)	Average root length (cm)	AvgDiam(mm)	SRL(cm/g)	Average distal root length(cm)	Distal root diameter (mm)	SDRL(cm/g)	Average lateral root length(cm)	Lateral root diameter(mm)	Taproot length (cm)	Taproot diameter (mm)	RMF	STRL(cm/g)	TRMF	RRD	TI	DBI	Lateral root branching density
1	1	0.556	0.215	0.341	0.0412276	742.905	0.27566	0.3329	3455.37	0.342834	0.327749	9359.37	6.31844	1.10375	33.8666	2.036	0.386691	831.495	0.1918	60.9112	0.682306	0.0729008	0.974411
2	1	0.367001	0.116001	0.251	0.0315658	724.586	0.397905	0.3187	6246.37	0.385356	0.268394	8690.6	3.16208	0.78955	38.3305	1.093	0.316078	1219.15	0.2721	104.442	0.729275	0.114216	2.53062
3	1	0.733	0.272	0.461	0.0503822	1223.92	0.314634	0.4394	4499.72	0.34273	0.360072	10384.5	10.8968	1.1571	33.9424	2.137	0.371078	681.932	0.1852	46.3061	0.650044	0.0323239	0.677619
4	1	0.42401	0.12001	0.304	0.0348583	468.116	0.19644	0.3233	3900.64	0.312877	0.258998	9579.73	3.88988	0.79365	32.3086	1.319	0.283036	938.183	0.2905	76.1977	0.73088	0.103869	1.11425
5	1	0.721	0.273	0.448	0.0790405	864.222	0.464137	0.3773	3165.65	0.299095	0.310115	13755.7	6.35259	0.71595	40.7326	2.78	0.378641	600.637	0.2895	56.4946	0.697057	0.0560259	1.00656
6	1	0.901	0.363	0.538	0.0778938	1002.92	0.298043	0.3525	2762.85	0.320811	0.282159	13957.7	7.70501	1.20135	44.7152	2.096	0.402886	581.069	0.2146	49.6284	0.665446	0.0644447	0.603822
7	1	0.311001	0.084001	0.227	0.0312378	622.784	0.296705	0.3212	7414.01	0.375768	0.252497	9685.94	8.11229	0.7839	35.2769	1.275	0.270099	1143.1	0.3719	113.43	0.704928	0.114967	0.651985
8	1	0.622	0.201	0.421	0.0519942	829.039	0.247179	0.379	4124.57	0.224272	0.274416	8176.63	2.19091	1.03455	38.1973	1.868	0.323151	743.624	0.2587	61.4105	0.702176	0.0737042	2.59181
9	1	0.279001	0.104001	0.175	0.0227866	538.115	0.172142	0.3652	5174.13	0.290383	0.288003	6780.97	6.07165	1.0245	24.9029	1.331	0.372762	1106.23	0.2191	89.2574	0.680801	0.0753827	0.883431
10	1	0.408001	0.126001	0.282	0.0429123	680.085	0.429618	0.3138	5397.46	0.284577	0.25341	11884.7	4.9905	0.61155	29.8028	1.782	0.308825	702.993	0.3406	73.0459	0.735874	0.141143	0.939509
11	1	0.458	0.161	0.297	0.0658232	656.962	0.202829	0.4188	4080.51	0.314755	0.305709	12387	3.41515	1.00665	40.2128	2.664	0.351528	618.388	0.4088	87.8009	0.744115	0.137533	1.44233
12	1	0.427	0.131	0.296	0.0485343	690.451	0.453647	0.334	5270.62	0.340217	0.269933	12126.3	3.95356	1.116	37.0774	1.649	0.306792	773.279	0.3705	86.8323	0.682869	0.0762395	1.32156
13	1	0.577	0.231	0.346	0.0513899	942.364	0.260393	0.3527	4079.5	0.292978	0.290534	9893.54	6.6064	1.0161	38.4991	1.902	0.400347	758.314	0.2225	66.7229	0.673996	0.0788696	0.883138
14	1	0.382	0.116	0.266	0.0321862	631.615	0.196337	0.3022	5444.96	0.216725	0.229751	6992.95	2.32219	0.8547	37.2364	0.959	0.303665	1171.04	0.2775	97.4775	0.702667	0.0862528	1.79931
15	1	0.19	0.077	0.113	0.0418326	577.88	0.206607	0.3303	7504.93	0.412445	0.289966	10431.8	3.69263	0.84765	41.9239	1.295	0.405263	1014.43	0.5433	220.652	0.773129	0.171164	1.19264
16	1	0.4	0.15	0.25	0.0502108	607.899	0.278725	0.2987	4052.66	0.326405	0.234292	13288.9	8.00922	0.76035	38.6897	1.645	0.375	779.963	0.3347	96.7242	0.725122	0.118869	0.69786
17	1	0.209001	0.079001	0.13	0.0269668	396.329	0.139553	0.3266	5016.77	0.516069	0.21985	14856.4	7.41019	0.92415	29.3422	1.33	0.377993	1101.39	0.3413	140.393	0.764947	0.26229	1.02242
18	1	0.312	0.094	0.218	0.0267483	609.933	0.359207	0.3521	6488.65	0.386401	0.280798	9870.79	5.99568	0.62205	27.4079	0.944	0.301282	1037.18	0.2846	87.8458	0.677049	0.0948905	1.13106
19	1	0.617	0.171	0.446	0.038387	701.709	0.293602	0.357	4103.56	0.275679	0.272011	9646.33	6.70379	1.22665	29.6433	2.049	0.277147	781.661	0.2245	48.0442	0.664925	0.0645019	1.51805
20	1	0.676	0.256	0.42	0.0615415	781.509	0.459982	0.377	3052.77	0.254171	0.273953	8467.17	2.39718	0.89465	49.564	1.872	0.378698	815.218	0.2404	73.3195	0.70675	0.0990125	1.75531
21	1	0.394	0.146	0.248	0.0383459	679.222	0.347428	0.3664	4652.21	0.392472	0.302597	10880.6	7.06539	0.6717	33.5966	1.438	0.370558	886.855	0.2626	85.2706	0.727373	0.125076	1.1013
22	1	0.561	0.225	0.336	0.0413149	579.589	1.22019	0.3838	2575.95	0.260158	0.282131	8536.83	2.86883	1.0203	32.8008	1.946	0.40107	803.625	0.1836	58.4684	0.729792	0.0422125	1.00607
23	1	0.259	0.075	0.184	0.0419875	344.632	0.125549	0.3549	4595.09	0.333343	0.269503	9057.16	3.6715	0.9033	42.1448	1.136	0.289575	1016.02	0.5598	162.721	0.806414	0.201686	1.04402
24	1	0.252002	0.075002	0.177	0.0288182	593.496	0.718518	0.3108	7913.07	0.250237	0.251482	7244.21	4.28393	0.6524	29.0942	0.966	0.297625	1021.92	0.3842	115.452	0.673791	0.0562685	1.0655
25	1	0.71	0.26	0.45	0.0656683	723.435	1.1216	0.3759	2782.44	0.272372	0.299961	10678.1	4.32291	0.74265	41.0437	2.244	0.366197	632.655	0.2526	57.808	0.710763	0.0989085	1.63241
26	1	0.273001	0.075001	0.198	0.0292115	432.975	0.271799	0.3198	5772.92	0.276406	0.271251	6817.11	4.22855	0.60765	32.0934	0.908	0.274728	1102.08	0.3895	117.558	0.762259	0.141894	0.903613
27	1	0.569	0.186	0.383	0.042151	539.568	0.454948	0.3573	2900.91	0.359808	0.304149	10471.5	1.78361	0.7197	35	1.517	0.326889	840.497	0.2266	61.5114	0.725693	0.0351277	1.2
28	1	0.193	0.05	0.143	0.0182259	351.81	0.341563	0.2896	7036.2	0.261327	0.25018	6985.03	4.74673	0.87895	21.5772	0.805	0.259067	1198.34	0.3645	111.799	0.733962	0.0929623	1.11229
29	2	0.41	0.187	0.223	0.0163588	455.822	0.741175	0.4666	2437.55	0.19306	0.355805	6791.19	5.28989	0.7398	18.8786	1.884	0.456098	1159.68	0.2693	46.0454	0.691871	0.0361952	0.84752
30	2	0.284	0.093	0.191	0.0397578	531.678	0.277639	0.3213	5716.97	0.338756	0.268389	13173.5	5.04174	0.7167	29.522	1.493	0.327465	759.047	0.4275	103.951	0.741499	0.176851	0.982318
31	2	0.636	0.25	0.386	0.0428889	946.677	0.489745	0.4065	3786.71	0.344486	0.316836	10781.2	5.48085	0.74415	33.5212	1.76	0.393082	798.95	0.1716	52.7063	0.658747	0.0468407	0.745797
32	2	0.585	0.184	0.401	0.0497659	700.15	0.422031	0.3419	3805.16	0.315607	0.275721	14326	3.77661	0.6699	30.8166	2.093	0.31453	632.993	0.2705	52.6779	0.664908	0.0693378	1.33045
33	2	0.310001	0.103001	0.207	0.0284571	609.689	0.728421	0.366	5919.25	0.299208	0.292693	8285.16	5.69808	0.7845	27.2115	1.28	0.33226	977.477	0.2763	87.7787	0.712249	0.0734899	1.02898
34	2	0.452	0.177	0.275	0.0484948	588.431	0.280339	0.371	3324.47	0.242935	0.290865	10434.6	8.27026	0.78165	30.0828	2.542	0.391593	634.116	0.274	66.5549	0.734283	0.0849277	0.664832
35	2	0.489	0.145	0.344	0.0332845	574.389	0.468889	0.3436	3961.31	0.325109	0.280063	13045.1	6.80793	0.54465	22.9546	1.681	0.296524	704.973	0.2295	46.9419	0.774749	0.136069	0.958414
36	2	0.73	0.255	0.475	0.0408005	1290.08	0.682581	0.3448	5059.13	0.247229	0.269033	10141.7	2.34233	0.7125	30.1516	2.051	0.349315	755.424	0.16	41.3036	0.674664	0.0546655	1.69145
37	2	0.636	0.232	0.404	0.0299371	851.875	0.292439	0.3723	3671.88	0.368652	0.292375	13086	4.58285	0.9237	29.3553	1.813	0.36478	1002.36	0.129	46.1561	0.674924	0.0872575	1.49888
38	2	0.331	0.104	0.227	0.0348697	369.725	0.170853	0.3345	3555.05	0.465228	0.286792	15495.2	4.73347	0.7527	23.7022	1.822	0.314199	694.842	0.3353	71.6079	0.782019	0.25116	1.05475
39	2	0.178	0.058	0.12	0.0292488	348.968	0.39122	0.3108	6016.69	0.413374	0.255965	13353.4	4.75664	0.7059	27.4144	1.106	0.325843	958.113	0.5043	154.013	0.800948	0.260583	0.984884
40	2	0.351	0.13	0.221	0.0438051	357.693	0.354151	0.326	2751.48	0.29561	0.292326	13031.5	4.39403	0.51465	26.344	2.047	0.37037	614.756	0.337	75.0541	0.735891	0.180596	0.835105
41	2	0.626	0.21	0.416	0.0388522	699.796	0.350951	0.3908	3332.36	0.380864	0.29281	12378.1	4.04448	0.72465	31.6408	1.653	0.335463	832.486	0.185	50.5444	0.66747	0.0769619	1.26419
42	2	0.377	0.129	0.248	0.0334257	338.594	0.460672	0.331	2624.76	0.332691	0.256042	13744.1	3.32353	0.7689	24.4903	1.906	0.342175	748.961	0.2591	64.961	0.669796	0.0608385	0.734985
43	2	0.479001	0.157001	0.322	0.0266127	535.588	0.256631	0.3771	3411.37	0.248762	0.304294	9051.73	5.9607	0.7803	18.6273	2.284	0.327768	715.494	0.1695	38.8878	0.715895	0.0890984	1.12738
44	2	0.162	0.076	0.086	0.0270515	539.836	0.469423	0.3337	7103.1	0.342241	0.273175	8373.26	6.9271	0.6834	31.3682	0.783	0.469136	1185.34	0.3559	193.631	0.706569	0.14884	0.701347
45	2	0.209	0.067	0.142	0.0242165	434.917	0.211742	0.314	6491.3	0.366947	0.262192	10718	6.44688	0.71085	26.5067	0.932	0.320574	1118.89	0.3614	126.826	0.712198	0.200022	0.679074
46	2	0.275	0.1	0.175	0.0370235	403.027	0.622916	0.3681	4030.27	0.3058	0.294113	10457.1	5.53881	0.4161	28.5293	1.383	0.363636	787.697	0.3702	103.743	0.746307	0.180405	0.911344
47	2	0.22101	0.08001	0.141	0.0330019	526.822	0.778171	0.3688	6584.45	0.280999	0.279754	7900.36	4.18596	0.74325	32.5179	1.454	0.36202	1007.23	0.4125	147.133	0.743601	0.184573	1.01483
48	2	0.121001	0.036001	0.085	0.0214707	323.424	0.308905	0.3224	8983.75	0.477485	0.286595	10264	5.5097	0.7266	27.01	0.836	0.297526	1285.95	0.5964	223.221	0.800084	0.275324	0.962606
49	2	0.17101	0.05001	0.121	0.0285869	270.426	0.446248	0.3818	5407.44	0.186054	0.34488	6632.25	1.45028	0.67335	25.8017	0.838	0.292439	922.628	0.5716	150.878	0.773242	0.257601	1.6278
50	2	0.156	0.083	0.073	0.0317874	411.091	0.326004	0.3348	4952.91	0.144025	0.311755	5176.06	2.99666	0.5319	27.2531	1.092	0.532051	876.407	0.383	174.699	0.75181	0.170618	1.21087
51	2	0.387	0.12	0.267	0.0414022	458.651	0.0946844	0.3735	3822.09	0.139015	0.376194	4943.16	4.09001	1.2666	28.0698	1.626	0.310078	693.045	0.345	72.5318	0.719997	0.13029	0.926262
52	2	0.122	0.027	0.095	0.0182061	285.373	0.0759375	0.3329	10569.4	0.153227	0.354654	4406.88	4.28437	1.08675	25.3277	0.844	0.221311	1422.08	0.6743	207.604	0.784374	0.328581	0.868614
53	2	0.253	0.121	0.132	0.0290139	512.738	0.127136	0.3859	4237.5	0.156215	0.346688	5755.58	3.82225	1.1586	28.9783	1.254	0.478261	1020.97	0.2398	114.539	0.730882	0.13751	1.03526
54	2	0.27	0.082	0.188	0.0351903	327.58	0.174803	0.3797	3994.88	0.162058	0.335571	4790.69	3.58769	0.68415	27.4924	1.355	0.303704	798.612	0.4291	101.824	0.782042	0.211769	1.01846
55	2	0.069	0.03	0.039	0.0111857	129.779	0.0549214	0.3517	4325.97	0.154385	0.295099	3840.87	3.53369	0.7443	13.994	0.945	0.434783	1278.86	0.3729	202.812	0.805631	0.321945	1.00043
56	2	0.41	0.111	0.299	0.0219958	645.295	0.218967	0.3627	5813.47	0.132134	0.376963	5263.92	4.152	0.90105	29.3933	0.93	0.270732	1366.01	0.1982	71.691	0.700623	0.0635226	1.08868
57	3	0.286	0.126	0.16	0.0222438	667.253	0.353231	0.3765	5295.66	0.1428	0.329607	5023.4	4.3428	0.67005	30.5029	0.857	0.440559	1371.3	0.1765	106.653	0.682903	0.0875337	0.852378
58	3	0.266	0.079	0.187	0.0278193	448.401	0.141407	0.3719	5675.96	0.130754	0.339836	5338.4	4.46093	0.97065	31.8799	1.388	0.296992	1145.96	0.3521	119.849	0.691323	0.137231	0.69009
59	3	0.376	0.157	0.219	0.0356092	610.111	0.305974	0.3871	3886.06	0.141465	0.36761	8381	4.13993	0.68445	25.997	1.723	0.417553	730.065	0.2268	69.141	0.723717	0.0949156	1.30784
60	3	0.29	0.127	0.163	0.0345213	552.019	0.321315	0.3575	4346.6	0.137508	0.346498	8457.58	4.86408	0.62355	25.7553	1.641	0.437931	746.07	0.2718	88.8114	0.677168	0.0881117	0.854193
61	3	0.114	0.037	0.077	0.0313981	194.284	0.0533016	0.3541	5250.93	0.172377	0.319337	11278.2	2.52597	0.60285	23.8941	1.412	0.324561	761.004	0.68	209.597	0.82091	0.290267	0.920729
62	3	0.309	0.153	0.206	0.0414108	669.58	0.240943	0.3714	6500.78	0.135555	0.356435	7093.2	4.89659	0.903	24.4249	2.189	0.495146	852.495	0.270659	79.045	0.676082	0.0715614	0.982604
63	3	0.086	0.041	0.045	0.0232833	231.783	0.0387792	0.337	5653.25	0.158863	0.325364	8430.58	4.22777	0.6106	21.4406	1.031	0.476744	920.856	0.567886	249.309	0.778632	0.320312	0.839529
64	3	0.188	0.084	0.104	0.0238442	352.166	0.229275	0.3269	4192.45	0.172129	0.322698	7404.39	3.09565	0.5832	27.3118	1.004	0.446809	1145.43	0.28386	145.276	0.733649	0.150882	0.805513
65	3	0.235	0.114	0.141	0.0512105	340.244	0.289816	0.3248	3619.62	0.127216	0.287626	9587.37	2.63823	0.4926	24.7002	1.759	0.485106	558.695	0.449215	105.107	0.814184	0.274909	0.688254
66	3	0.271	0.119	0.152	0.0306551	849.239	0.603153	0.3125	7136.46	0.124576	0.337347	7227.54	2.65687	0.7276	28.9027	1.82	0.439114	942.835	0.257606	106.652	0.691184	0.0667192	1.17636
67	3	0.077	0.036	0.041	0.0213435	197.531	0.240598	0.3948	5486.98	0.176385	0.365815	7232.16	4.17348	0.56655	22.6253	0.809	0.467532	1060.06	0.592875	293.835	0.809286	0.312616	0.751371
68	3	0.333	0.124	0.209	0.0287582	361.633	0.300859	0.4176	2916.4	0.186145	0.378122	10337.5	3.61084	0.51	21.7752	1.628	0.372372	757.182	0.231921	65.391	0.744948	0.158997	0.780705
69	3	0.274	0.098	0.176	0.0270455	346.049	0.108684	0.355	3531.12	0.192965	0.340008	9960.24	5.75042	0.5046	24.5026	1.342	0.357664	905.978	0.275974	89.4255	0.753611	0.185396	0.652992
70	3	0.211	0.091	0.12	0.0364352	306.416	0.117762	0.4962	3367.21	0.122798	0.451825	6381.91	3.0414	0.8652	24.6711	2.19	0.43128	677.123	0.400386	116.925	0.746762	0.180724	0.972798
71	3	0.23401	0.12001	0.164	0.0318075	696.35	0.284457	0.2821	9946.43	0.145161	0.288029	8645.64	2.79479	0.8244	29.5337	0.939	0.512841	1419.37	0.265041	126.207	0.71172	0.110794	1.25281
72	3	0.111	0.047	0.064	0.0202873	215.926	0.0704489	0.425	4594.17	0.115186	0.395467	5171.74	3.95442	0.8493	18.1666	1.34	0.423423	895.467	0.431645	163.663	0.785322	0.270077	0.660553
73	3	0.074	0.023	0.051	0.0128405	211.842	0.173641	0.287	9210.54	0.156224	0.278057	7263.02	4.00432	0.51495	26.9076	0.889	0.310811	2095.52	0.558283	363.616	0.810044	0.310848	0.70612
74	3	0.093	0.033	0.062	0.0182968	184.354	0.0446593	0.351	5946.89	0.172135	0.343664	4999.69	2.53353	0.7351	27.552	0.79	0.354839	1592.9	0.463538	296.258	0.843832	0.376971	0.762195
75	3	0.218	0.08	0.138	0.0415321	298.103	0.290549	0.3946	3726.29	0.16794	0.34955	9061.86	2.9047	0.8376	31.5318	1.75	0.366972	759.215	0.519152	144.641	0.798313	0.275437	0.761136
76	3	0.204	0.069	0.135	0.0323776	274.982	0.100763	0.3385	3985.25	0.247821	0.301623	11216.1	2.74245	0.5457	26.0838	1.282	0.338235	805.613	0.469241	127.862	0.836164	0.339584	0.881773
77	3	0.126	0.048	0.078	0.0249128	226.567	0.289728	0.3499	4720.16	0.147837	0.327495	7029.53	3.40297	0.54225	25.4373	1.118	0.380952	1021.05	0.519018	201.883	0.782014	0.309326	0.786247
78	3	0.081	0.032	0.049	0.0211602	143.772	0.241229	0.3348	4492.88	0.129226	0.311769	6586.47	1.83571	0.5184	21.173	1.249	0.395062	1000.61	0.661256	261.395	0.826799	0.391503	1.13352
79	3	0.183	0.086	0.117	0.0258535	387.513	0.436389	0.3321	5871.42	0.176395	0.30921	6820.1	6.21289	0.4908	27.7345	0.877	0.469945	1329.97	0.300622	151.555	0.732904	0.204149	0.540843
80	3	0.229	0.125	0.144	0.0439906	302.072	0.298785	0.3564	3553.78	0.166839	0.311069	9165.63	3.95272	0.5016	30.6949	1.343	0.545852	930.413	0.351925	134.039	0.753011	0.296731	0.586417
81	3	0.299	0.136	0.163	0.0301051	766.341	0.321569	0.3445	5634.86	0.164504	0.339407	8005.01	5.35214	0.6451	32.3711	1.43	0.454849	1075.27	0.221361	108.265	0.703078	0.102621	0.827056

## Sheet: Explanation
Variable	Units	Observations
Numbers	None	The number of seedlings
Treatments	None	Drought treatments. "1", "2" and "3" separately is the treatment of optimal water content(70-80% of field capacity), moderate drought stress(50-60%) and severe drought stress(30-40%)
Total biomass	g	Dry weight of total plant
belowground biomass	g	Dry weight of belowground part of plant
aboveground biomass	g	Dry weight of aboveground part of plant
Taproot biomass	g	Dry weight of taproot
Total root length	cm	The root length of whole root system
Average root length	cm	The average of internode length of whole root system
AvgDiam	mm	The average of root diameter of whole root system
SRL	cm/g	Specific root length, the ratio of total root length to total biomass
Average distal root length	cm
Distal root diameter	mm
SDRL	cm/g	Specific distal root length, the ratio of certain distal root length to certain distal root biomass
Average lateral root length	cm
Lateral root diameter	mm
Taproot length	cm
Taproot diameter	mm
RMF	None	Relative mass fraction, the proportion of belowground biomass and total biomass
STRL	cm/g	Specific taproot length, the ratio of taproot length to taproot biomass
TRMF	None	Taproot mass fraction, the proportion of taproot biomass and belowground biomass
RRD	None	Relative root depth, the ratio of taproot length to total biomass
TI	None	Topological index, for detailed calculation method see Beidler et al. (2015)
DBI	None	Dichotomous branching index, for detailed calculation method see Beidler et al. (2015)
Lateral root branching density	n/cm	Lateral root numbers per unit length of taproot
REFERENCE: Beidler K V , Taylor B N , Strand A E , et al. Changes in root architecture under elevated concentrations of CO 2 and nitrogen reflect alternate soil exploration strategies[J]. New Phytologist, 2015, 205(3):1153-1163.
